# Supplementary material
Source: PubMed Central journal article supplement (PMC1914134)
Supplement: plntphys_pp.107.098681_5.pdf [file plntphys_pp.107.098681_5.pdf]

**TABLE S1****Array 1 Oligonucleotide Sequences**

|    | <b>Name</b>              | <b>Genbank Accession Number</b> | <b>Locus</b> | <b>Sequence</b>                                                                       |
|----|--------------------------|---------------------------------|--------------|---------------------------------------------------------------------------------------|
| 1  | Actin 2                  | At3g18780                       | At3g18780    | GCTGAGGGAAGCAAGAATGGAACCACCGA<br>TCCAGACACTGTACTTCCTTTCAGGTGGTG<br>CGTTGTCTAAGTCTG    |
| 2  | GST                      | U41998                          | At2g29450    | CCAGTATCTCTCCACGTA CTCTCGTACGGTA<br>TGCCTTTGAGTTGAGAGCCATCTCGACCC<br>GCTTGTCTAAGTCTG  |
| 3  | PAL1                     | X62747                          | At2g37040    | GTTGATTCTGTACAAGCATGGCGGCTCTTGT<br>GGCGGAGTGTGGCAATGTGTGGCTTGTTC<br>GCTTGTCTAAGTCTG   |
| 4  | S-19                     | AF37027                         | At3g02080    | GTTGAGCTCGACACCAAAGGAGGAAGAAG<br>GATCACTTCCAGTGGCCAAAGGGATTTGGA<br>CGTTGTCTAAGTCTG    |
| 5  | COR47                    | AB004872                        | At1g20440    | GTGACAGCTGGTGAATCCTCTGCTTTCTCG<br>TCGTGGTGACCAGGAAGCTTCTCCTTGATC<br>GCTTGTCTAAGTCTG   |
| 6  | $\beta$ -Tubulin 8       | M84705                          | At5g23860    | GTTGAGCTCGACACCAAAGGAGGAAGAAG<br>GATCACTTCCAGTGGCCAAAGGGATTTGGA<br>CGTTGTCTAAGTCTG    |
| 7  | CHS                      | M20308                          | At5g13930    | CCACACCATCCTTAGCTGACTTCCTCCTCA<br>TCTCGTCTAGTATGAAGAGAACGCACGCGC<br>GCTTGTCTAAGTCTG   |
| 8  | ERD14                    | D17715                          | At1g76180    | CTCTGGCTCCGGCTCTGAAATATGAACCTT<br>CTGCTCAAACCTCTGAAGCGATCGGAGTCTC<br>GCTTGTCTAAGTCTG  |
| 9  | RAB18                    | U75603                          | At1g43890    | CTCAACGTTGACTCGAGTCTTTGCACTACA<br>CTCCAGAAACAAACATCCGTA CTCCCGAGC<br>GCTTGTCTAAGTCTG  |
| 10 | $\beta$ -Thromboglobulin | M17017                          | (human)      | CTGCAGAAATCAGGAAGGCTGCCAAGAGA<br>GCCACGGCCAGCTTGGAAGTCATGTTTACA<br>CGTTGTCTAAGTCTG    |
| 11 | KIN1                     | NM_121601                       | At5g15960    | CATTGCTCTTCTCCTCAGCTTTGCCAGCGGT<br>CTGACCGGCTTGGAAGGCATTCTTGTGGG<br>CTTGTCTAAGTCTG    |
| 12 | KIN2                     | X62281                          | At5g15970    | GCCGGTCTTGTCTTTCACGAAGTTAACACC<br>TCCACTGCCGCATCCGATATACTCTTCC<br>GCTTGTCTAAGTCTG     |
| 13 | RD29B                    | D13044                          | At5g52300    | CCTCTGTTGCTGAAAGCAGAGACACAGGA<br>GTGTTCAATGGCTCTTGATGAGCCTCTCTG<br>CGTTGTCTAAGTCTG    |
| 14 | Histone 1.3              | U73781                          | At2g18050    | CACACAGTTCCATCTTCTCTCCTCCTCCTC<br>AGTGATCAAGCAGCGGAAGCTTTCATGGC<br>GCTTGTCTAAGTCTG    |
| 15 | Histone 1.1              | D13044                          | At1g06760    | GCCGATGGGAGTTTAAACGAGGCTTTGACC<br>TTCACAAGCTTCCCAGAAGCAACGAGTCTC<br>GCTTGTCTAAGTCTG   |
| 16 | RD29A                    | AF198054                        | At5g52310    | CATCACCCTTGGAGCAAACGTA CTCTCGTTA<br>CATCCTCTGTTCCAGAAAGCAGAGAGACC<br>GGCTTGTCTAAGTCTG |

**TABLE S2****Array 2 Oligonucleotide Sequences**

|    | <b>Name</b>  | <b>Genbank<br/>Accession<br/>Number</b> | <b>Locus</b> | <b>Sequence</b>                                                        |
|----|--------------|-----------------------------------------|--------------|------------------------------------------------------------------------|
| 1  | EF1 $\alpha$ | AF360167                                | At5g60390    | GCTTGTCTAAGTCTGGTGGGTACTCGGAGAAAG<br>TCTCAACAACCATGGGCTTGGTTGGGGTCATC  |
| 2  | Actin 2      | U41998                                  | At3g18780    | GCTTGTCTAAGTCTGGCTGGAATGTGCTGAGGG<br>AAGCAAGAATGGAACCACCGATCCAGACACTG  |
| 3  | FT           | AB027505                                | At1g65480    | GCTTGTCTAAGTCTGGGAGATATTCTCGGAGGT<br>GAGGGTTGCTAGGACTTGAACATCTGGATCC   |
| 4  | LFY          | M91208                                  | At5g61850    | GCTTGTCTAAGTCTGCACTTCCCCAGGCTCCGTT<br>ACGATAAACGGATGCTCCCTCTGTCTCTCTG  |
| 5  | EMF1         | AF319968                                | At5g11530    | GCTTGTCTAAGTCTGGGTAAGGAGCGTCGGCAC<br>ATACGAAGGGGAGACATTGGAGCGTGTTGTTC  |
| 6  | SHP1         | M55550                                  | At3g58780    | GCTTGTCTAAGTCTGCGTACTCATAGAGACGGC<br>CACGAGTGGAGAAGATGACGAGGGCAACTTCG  |
| 7  | SHP2         | M55553                                  | At2g42830    | GCTTGTCTAAGTCTGCTTCGGTGATGGTCGGAG<br>GGTTAACGGCGTCGGAGCAAGCTTTCTTGTAC  |
| 8  | AGL15        | U22528                                  | At5g13790    | GCTTGTCTAAGTCTGCTGCAGTTTCGCTGCTCGT<br>GTTTGTGTCACTGAATCGCTTGACGGGCTC   |
| 9  | ANT          | U41339                                  | At4g37750    | GCTTGTCTAAGTCTGCCTCTTCTTCTTCGCAGCC<br>GCCATTGTCGTCGCTCAAACCCAACGCTTG   |
| 10 | CYP78A9      | AB036059                                | At3g61880    | GCTTGTCTAAGTCTGCACACGAGAGCCTCAGTT<br>TCTCGGACAAGTCAACGGTCTTCTCATCGGAC  |
| 11 | DWF4         | AF044216                                | At3g50660    | GCTTGTCTAAGTCTGCACATAGCCTTGGCCCTC<br>CTCCAAACGGCATGTAGTTGTTTCCCCACGTC  |
| 12 | PAP1         | AF325123                                | At1g56650    | GCTTGTCTAAGTCTGGGTGGGGCATTGAGATGG<br>TTGCAGTCGTTGTTAACTGTGAAGGATCGAGG  |
| 13 | ATHB-8       | Z50851                                  | At4g32880    | GCTTGTCTAAGTCTGCCTCTGCTTCCACATGAAT<br>CTCCGGCTGTTCTGCTCCCTACGTCTAGAGC  |
| 14 | KNAT1        | U14174                                  | At4g08150    | GCTTGTCTAAGTCTGGATCTTCGGCCCTCGGGT<br>CTATTTCCGGTAATTCTGTTTCCCCTCCGCTG  |
| 15 | CDC2b        | D10851                                  | At3g54180    | GCTTGTCTAAGTCTGCCTCCGAACCATCTCAGC<br>AAAGATAACAACCAACAGACCACATGTCAACAC |
| 16 | NAC1         | AF198054                                | At1g56010    | GCTTGTCTAAGTCTGGGGAGGATGATGAGATCC<br>TTGGAGACGGAATTCGTGCATGACCCAATCGG  |
| 17 | NPR1         | U76707                                  | At1g64280    | GCTTGTCTAAGTCTGGTCGTTTCTCAGCAGTGTC<br>GTCTTCTCCGCAAGCCAGTTGAGTCAAGTCC  |
| 18 | PDF1.2       | A68653                                  | At5g44420    | GCTTGTCTAAGTCTGCAAACCCTGACCATGTC<br>CCACTTGGCTTCTCGCACAACCTTCTGTGCTTC  |
| 19 | PAD4         | AF188329                                | At3g52430    | GCTTGTCTAAGTCTGGTATCTTGCCTGTGCTCG<br>CGTATCTGCTTCTCACACACTCCTCAGGCAC   |
| 20 | EDS1         | AF128407                                | At3g48090    | GCTTGTCTAAGTCTGGAGGCAAAGTTTCTCTA<br>CAGACGCCTTTCGAGCAAGCGTAATCCGAGGG   |
| 21 | RD29A        | D13044                                  | At5g52310    | GCTTGTCTAAGTCTGTGGAGCAAACGTAATCGT<br>TACATCCTCTGTTCCAGAAAGCAGAGAGACCG  |
| 22 | KIN1         | X51474                                  | At5g15960    | GCTTGTCTAAGTCTGGTAGTACCTCAGCTTTGCC<br>AGCGGTCTGACCGGCTTGAAGGCATTCTTG   |
| 23 | ANP1         | AB000796                                | At1g09000    | GCTTGTCTAAGTCTGCTTTAGTAGCTCAGATGC<br>GGTTGGCCGCAGATTTGGTACCTCCTGCAGAC  |

|    |                  |          |           |                                                                         |
|----|------------------|----------|-----------|-------------------------------------------------------------------------|
| 24 | SOS1             | AF256224 | At2g01980 | GCTTGTCTAAGTCTGCTTTCAACTGTAGGCCAG<br>TCAGCAGGTCCTAGCTCCTCATCGTCTCCTAG   |
| 25 | AtMPK3           | D21839   | At3g45640 | GCTTGTCTAAGTCTGGGCTCATCATTCGGGTCG<br>TGCAATTTAGCAAGGTAAGTGGTGATTTCAGAGC |
| 26 | AtMPK6           | D21842   | At2g43790 | GCTTGTCTAAGTCTGCTCCATGAGCAAGCGAAG<br>CTGATGGACATGATCTCGTCCAGGGAAGAGTG   |
| 27 | DREB1A           | AB013815 | At4g25480 | GCTTGTCTAAGTCTGCTGTTCCGCCGTGTAAAT<br>AGCCTCCACCAACGTCTCCTCCATGTCTGAAGC  |
| 28 | CBF1             | U77378   | At4g25490 | GCTTGTCTAAGTCTGGGTTTCTTCGGACAACCTC<br>GTGGCCAACGTCTGGACAATAATCTCCGCCTTG |
| 29 | Actin 8          | U42007   | At1g49240 | GCTTGTCTAAGTCTGGGACTTCTGGGCACCTGA<br>ATCTCTCAGCACCGATCGTGATCACTTGTCCG   |
| 30 | $\alpha$ tubulin | M17189   | At5g19770 | GCTTGTCTAAGTCTGCAGGCCATGTACTTTCCGT<br>GTCTCGGGTCACACTTTGCCATCATGCTAGC   |
| 31 | $\beta$ tubulin  | M20405   | At1g75780 | GCTTGTCTAAGTCTGCTCCGGGACTGTGAGAGA<br>GATGTACTGTTGAGAGCCACGGGAAGTGAGAG   |

**TABLE S3****Gene Function Array 1**

|    | <b>Name</b>              | <b>Genbank Accession Number</b> | <b>Locus</b> | <b>Function</b>                                                                                                                                    |
|----|--------------------------|---------------------------------|--------------|----------------------------------------------------------------------------------------------------------------------------------------------------|
| 1  | Actin 2                  | At3g18780                       | At3g18780    | Actin 2. Ubiquitously expressed; used as normalization control.                                                                                    |
| 2  | GST                      | U41998                          | At2g29450    | Glutathione-S-Transferase. Glutathione metabolism.                                                                                                 |
| 3  | PAL1                     | X62747                          | At2g37040    | Phenylalanine Ammonia-Lyase 1. Defense response, response to oxidative stress                                                                      |
| 4  | S-19                     | AF37027                         | At3g02080    | 40S Ribosomal Protein S19. Constituent of ribosome. Used as normalization control.                                                                 |
| 5  | COR47                    | AB004872                        | At1g20440    | Cold Regulated gene 47. Belongs to the dehydrin protein family. Response to stress and abscisic acid.                                              |
| 6  | $\beta$ -Tubulin 8       | M84705                          | At5g23860    | $\beta$ -Tubulin 8. Structural constituent of cytoskeleton. Used as normalization control.                                                         |
| 7  | CHS                      | M20308                          | At5g13930    | Chalcone Synthase. Response to oxidative stress.                                                                                                   |
| 8  | ERD14                    | D17715                          | At1g76180    | Early Response to Dehydration 14. Response to cold, response to desiccation, response to abscisic acid stimulus, response to gibberellin stimulus. |
| 9  | RAB18                    | U75603                          | At1g43890    | Ras-related small GTPase 18. Regulation of transcription.                                                                                          |
| 10 | $\beta$ -Thromboglobulin | M17017                          | (human)      | $\beta$ -Thromboglobulin. Used as negative control. Should never show a signal.                                                                    |
| 11 | KIN1                     | NM_121601                       | At5g15960    | Cold and ABA inducible protein KIN1. Stress induced.                                                                                               |
| 12 | KIN2                     | X62281                          | At5g15970    | Cold and ABA inducible protein KIN2. Stress induced.                                                                                               |
| 13 | RD29B                    | D13044                          | At5g52300    | Responsive to Desiccation 29B. Response to water deprivation, response to salt stress, response to abscisic acid stimulus, dry seed stage          |
| 14 | Histone 1.3              | U73781                          | At2g18050    | Histone Protein 1.3. DNA binding, nucleosome assembly, nucleosome.                                                                                 |
| 15 | Histone 1.1              | D13044                          | At1g06760    | Histone Protein 1.1. DNA binding, nucleosome assembly                                                                                              |
| 16 | RD29A                    | AF198054                        | At5g52310    | Response to cold stress and salt stress.                                                                                                           |

**TABLE S4****Gene Function Array 2**

|    | <b>Name</b>  | <b>Genbank Accession Number</b> | <b>Locus</b> | <b>Function</b>                                                                                                                                             |
|----|--------------|---------------------------------|--------------|-------------------------------------------------------------------------------------------------------------------------------------------------------------|
| 1  | EF1 $\alpha$ | AF360167                        | At5g60390    | Translation elongation factor chain A4. Ubiquitously expressed; used as normalization control                                                               |
| 2  | Actin 2      | U41998                          | At3g18780    | Actin 2 gene. Ubiquitously expressed; used as normalization control                                                                                         |
| 3  | FT           | AB027505                        | At1g65480    | FLOWERING LOCUS T. Promotes flowering                                                                                                                       |
| 4  | LFY          | M91208                          | At5g61850    | LEAFY. Promotes transition to flowering                                                                                                                     |
| 5  | EMF1         | AF319968                        | At5g11530    | EMBRYONIC FLOWER 1. Represses development of flowering                                                                                                      |
| 6  | SHP1         | M55550                          | At3g58780    | SHATTERPROOF 1. Required for fruit dehiscence                                                                                                               |
| 7  | SHP2         | M55553                          | At2g42830    | SHATTERPROOF 2. Involved in valve margin and dehiscence zone differentiation                                                                                |
| 8  | AGL15        | U22528                          | At5g13790    | AGAMOUS-Like 15. Embryogenesis and post-germinative development                                                                                             |
| 9  | ANT          | U41339                          | At4g37750    | AINTEGUMENTA. Floral organ development                                                                                                                      |
| 10 | CYP78A9      | AB036059                        | At3g61880    | Cytochrome P450 monooxygenase (CYP78A9). Involved in fruit development                                                                                      |
| 11 | DWF4         | AF044216                        | At3g50660    | DWARF 4. Cytochrome P450 monooxygenase (CYP90B1). A 22 $\alpha$ -hydroxylase, rate-limiting in brassinosteroid biosynthesis; organ size                     |
| 12 | PAP1         | AF325123                        | At1g56650    | Production of Anthocyanin Pigment 1. Anthocyanin metabolism and radical scavenging                                                                          |
| 13 | ATHB-8       | Z50851                          | At4g32880    | Vascular differentiation                                                                                                                                    |
| 14 | KNAT1        | U14174                          | At4g08150    | Knotted-Like Arabidopsis Thaliana 1. Shoot and style development                                                                                            |
| 15 | CDC2b        | D10851                          | At3g54180    | Cyclin-dependent kinase B1. Cell cycle control                                                                                                              |
| 16 | NAC1         | AF198054                        | At1g56010    | NAC-domain containing 1. Auxin-inducible, root growth                                                                                                       |
| 17 | NPR1         | U76707                          | At1g64280    | Non-Expresser of PR genes 1. Disease resistance                                                                                                             |
| 18 | PDF1.2       | A68653                          | At5g44420    | Plant Defensin 1.2. Disease resistance                                                                                                                      |
| 19 | PAD4         | AF188329                        | At3g52430    | Phytoalexin-Deficient 4. Disease resistance                                                                                                                 |
| 20 | EDS1         | AF128407                        | At3g48090    | Enhanced Disease Susceptibility 1. Disease resistance                                                                                                       |
| 21 | RD29A        | D13044                          | At5g52310    | Responsive to Desiccation 29A. Response to cold stress                                                                                                      |
| 22 | KIN1         | X51474                          | At5g15960    | Cold and ABA inducible protein KIN1. Stress induced.                                                                                                        |
| 23 | ANP1         | AB000796                        | At1g09000    | NPK1-related protein kinase 1S. Response to stress                                                                                                          |
| 24 | SOS1         | AF256224                        | At2g01980    | Salt-Overly Sensitive 1. Plasma membrane-localized Na <sup>+</sup> /H <sup>+</sup> antiporter; functions in extrusion of Na <sup>+</sup> from the cytoplasm |
| 25 | AtMPK3       | D21839                          | At3g45640    | Mitogen-Activated Protein Kinase 3. Involved in stress responses                                                                                            |
| 26 | AtMPK6       | D21842                          | At2g43790    | Mitogen-Activated Protein Kinase 6. Involved in stress responses                                                                                            |
| 27 | DREB1A       | AB013815                        | At4g25480    | Dehydration Response Element B1A. Response to                                                                                                               |

|    |                  |        |           |                                                                        |
|----|------------------|--------|-----------|------------------------------------------------------------------------|
|    |                  |        |           | low temperature                                                        |
| 28 | CBF1             | U77378 | At4g25490 | Cold Binding Factor 1. Response to low temperature                     |
| 29 | Actin 8          | U42007 | At1g49240 | Actin 8. Generally expressed; used as normalization control            |
| 30 | $\alpha$ tubulin | M17189 | At5g19770 | Tubulin $\alpha$ 3. Generally expressed; used as normalization control |
| 31 | $\beta$ tubulin  | M20405 | At1g75780 | Tubulin $\beta$ 1. Generally expressed; used as normalization control  |
