# Supplementary material
Source: PubMed Central journal article supplement (PMC1914134)

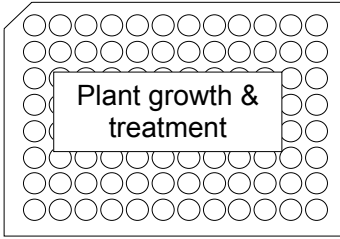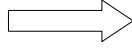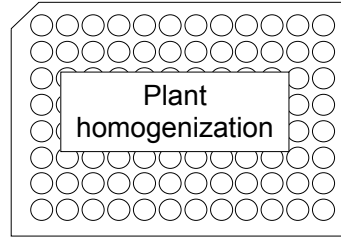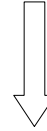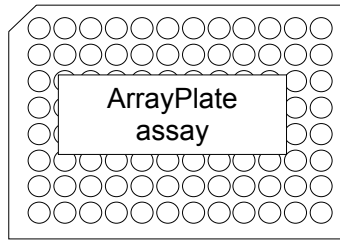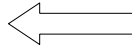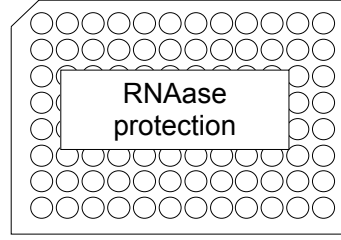

Supplement: plntphys_pp.107.098681_1.pdf [file plntphys_pp.107.098681_1.pdf]

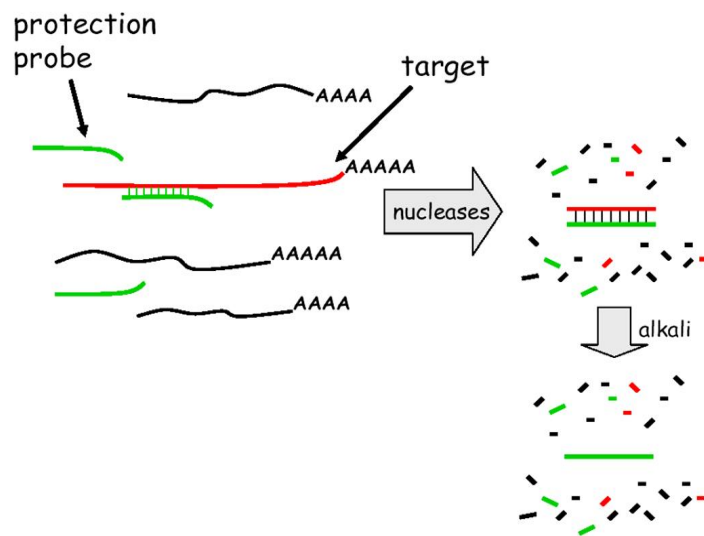

Supplement: plntphys_pp.107.098681_2.pdf [file plntphys_pp.107.098681_2.pdf]

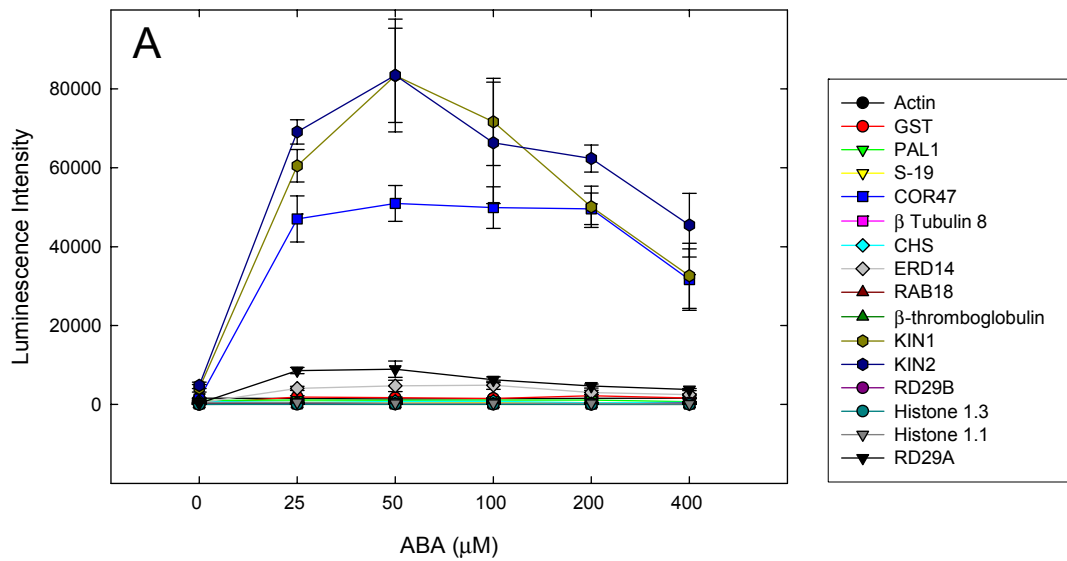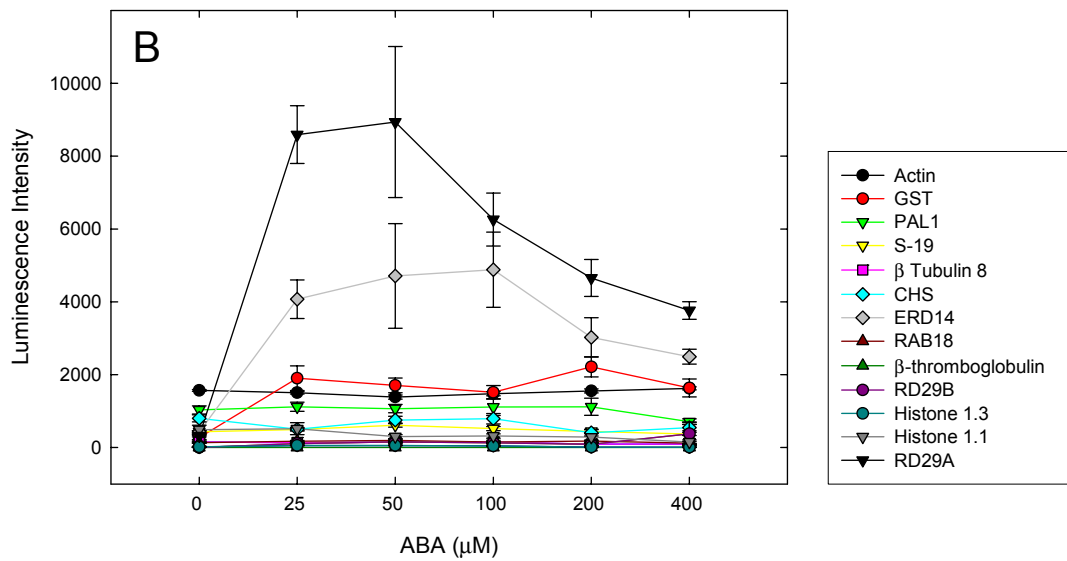

Supplement: plntphys_pp.107.098681_3.pdf [file plntphys_pp.107.098681_3.pdf]
